# Supplementary material for: A salt-sensing kinase in T lymphocytes, SGK1, drives hypertension and hypertensive end-organ damage
Source: JCI journal article supplement (doi:10.1172/jci.insight.92801), 2017-07-05
Supplement: sd1 [file 1]

## **A Salt Sensing Kinase in T Lymphocytes, SGK1, Drives Hypertension and Hypertensive End-Organ Damage**

Allison E. Norlander<sup>1</sup>, Mohamed A. Saleh<sup>2,3</sup>, Arvind K. Pandey<sup>4</sup>, Hana A. Itani<sup>2</sup>, Jing Wu<sup>1†</sup>, Liang Xiao<sup>2</sup>, Jay Kang<sup>1</sup>, Bethany L. Dale<sup>1</sup>, Slavina B. Goleva<sup>1</sup>, Fanny Laroumanie<sup>2</sup>, Liping Du<sup>5</sup>, David G. Harrison<sup>1,2</sup>, Meena S. Madhur<sup>\*1,2</sup>

<sup>1</sup>Department of Molecular Physiology and Biophysics, Vanderbilt University, Nashville, TN 37232, USA.

<sup>2</sup>Division of Clinical Pharmacology, Department of Medicine, Vanderbilt University Medical Center, Nashville, TN 37232, USA.

<sup>3</sup>Department of Pharmacology and Toxicology, Faculty of Pharmacy, Mansoura University, Mansoura, Egypt.

<sup>4</sup>Division of Cardiology, Department of Medicine, Vanderbilt University Medical Center, Nashville, TN 37232, USA.

<sup>5</sup>Vanderbilt Center for Quantitative Sciences, Vanderbilt University School of Medicine, Nashville, TN 37232, USA.

<sup>†</sup>Current address: Department of Pharmacology, The University of Iowa Carver College of Medicine, Iowa City, IA 52242, USA.

## SUPPLEMENTAL MATERIAL

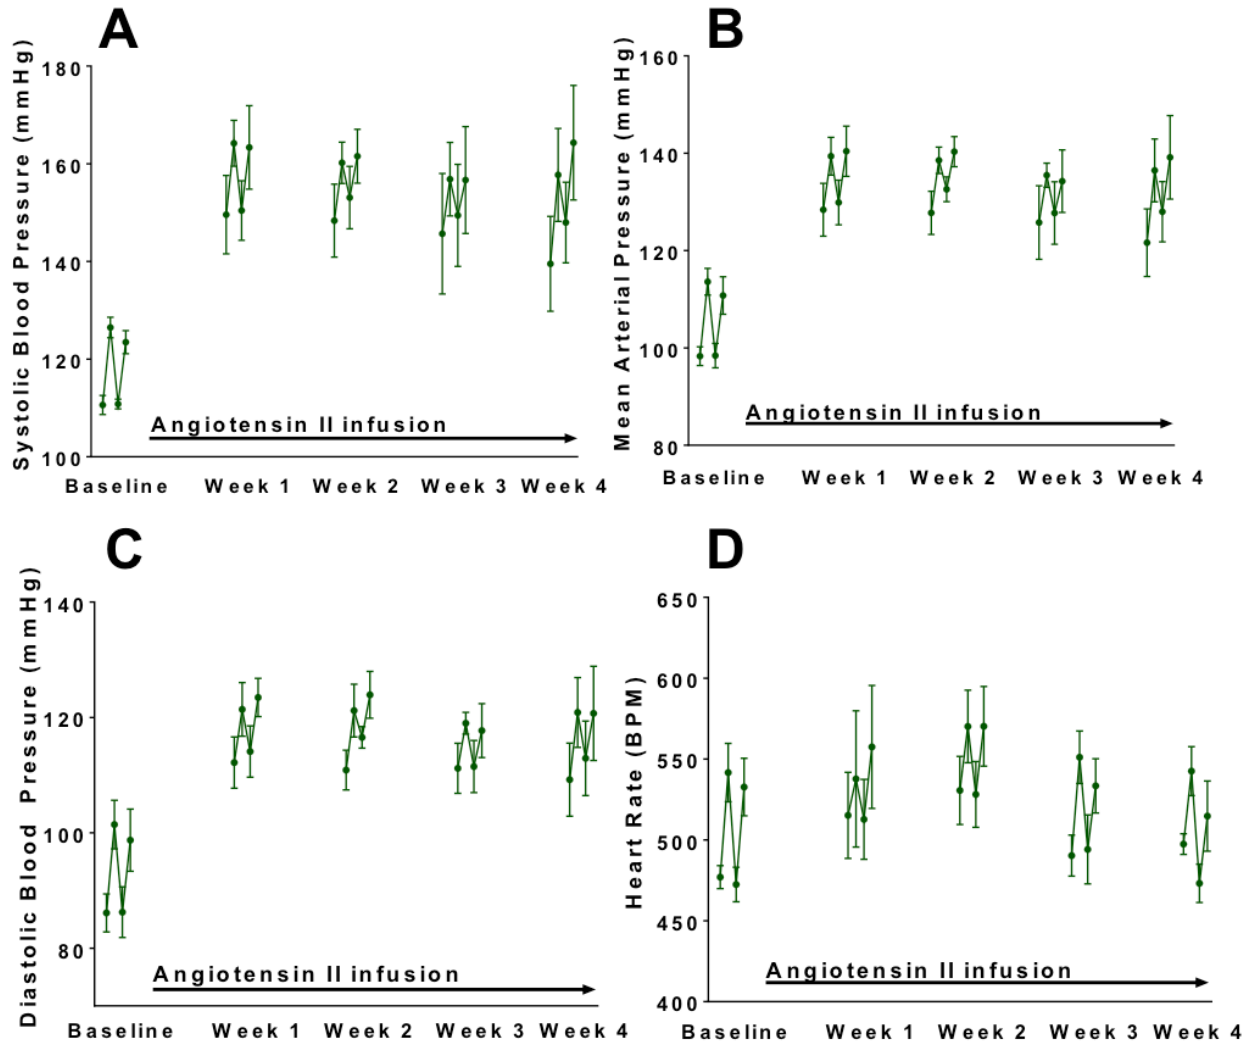

**Supplemental Figure 1. Cre recombinase expression in T cells does not affect Ang II-induced blood pressure response.** Telemetry recordings of (A) systolic blood pressures, (B) mean arterial pressures, (C) diastolic blood pressures, and (D) heart rates in  $tg^{CD4cre}$  mice infused with Ang II (490ng/kg/min) for 28 days. Data were recorded for 2 days at baseline and weekly thereafter during Ang II infusion. All data are expressed as mean  $\pm$  SEM (n = 5).

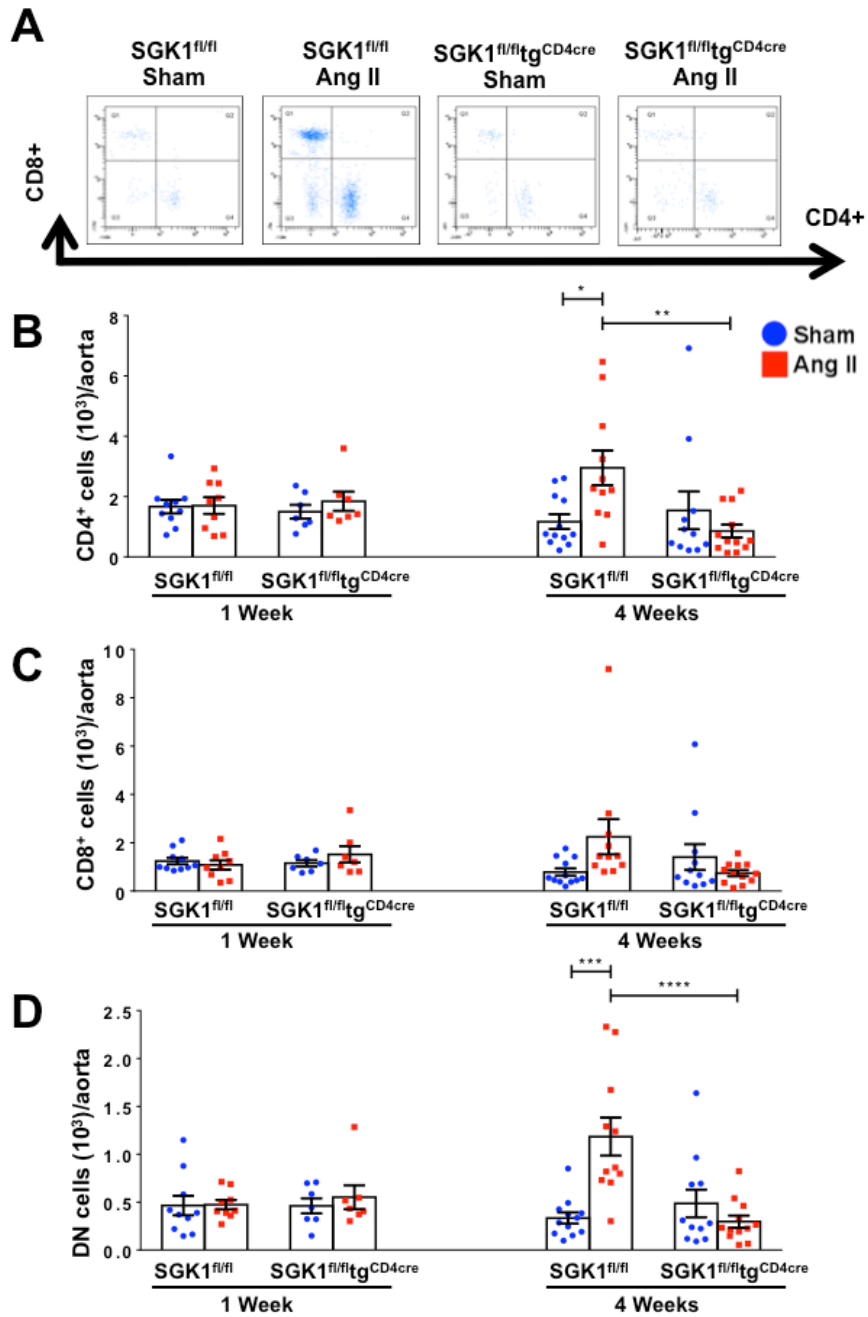

**Supplemental Figure 2. T cell SGK1 deficiency prevents the chronic phase of Ang II-induced vascular inflammation.** (A) Representative flow cytometry dot plots showing gating strategy for T cell subsets (CD4<sup>+</sup>, CD8<sup>+</sup>, and CD3<sup>+</sup>CD4<sup>-</sup>CD8<sup>-</sup> double negative (DN) cells) in single cell suspensions from the thoracic aorta of SGK1<sup>fl/fl</sup> and SGK1<sup>fl/fl</sup>tg<sup>CD4cre</sup> mice infused with Ang II or vehicle (Sham) for 7 or 28 days. (B-D) Summary data of absolute numbers of indicated cell types per thoracic aorta (\**P*<0.05, \*\**P*<0.01, \*\*\**P*<0.001, \*\*\*\**P*<0.0001; two-way ANOVA/Holm-Sidak's post hoc test; n = 7-12 per group). All data are expressed as mean ± SEM.

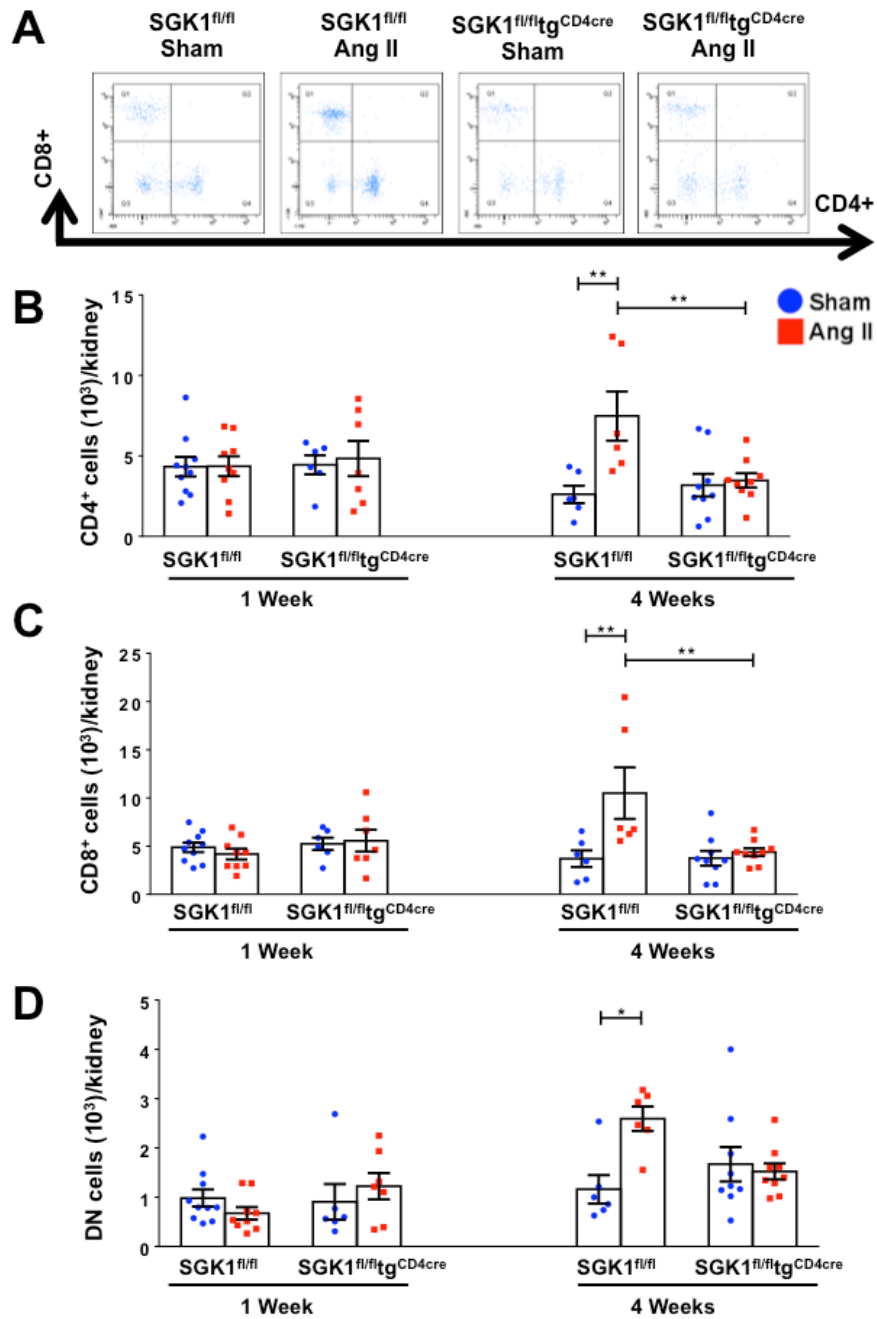

**Supplemental Figure 3. T cell SGK1 deficiency prevents the chronic phase of Ang II-induced renal inflammation.** (A) Representative flow cytometry dot plots showing gating strategy for T cell subsets (CD4<sup>+</sup>, CD8<sup>+</sup>, and CD3<sup>+</sup>CD4<sup>-</sup>CD8<sup>-</sup> double negative (DN) cells) in single cell suspensions from one kidney of SGK1<sup>fl/fl</sup> and SGK1<sup>fl/fl</sup>tg<sup>CD4cre</sup> mice infused with Ang II or vehicle (Sham) for 7 or 28 days. (B-D) Summary data of absolute numbers of indicated cell types per kidney (\**P*<0.01, \*\**P*<0.01; two-way ANOVA/Holm-Sidak's post hoc test; n=6-10 per group). All data are expressed as mean ± SEM.

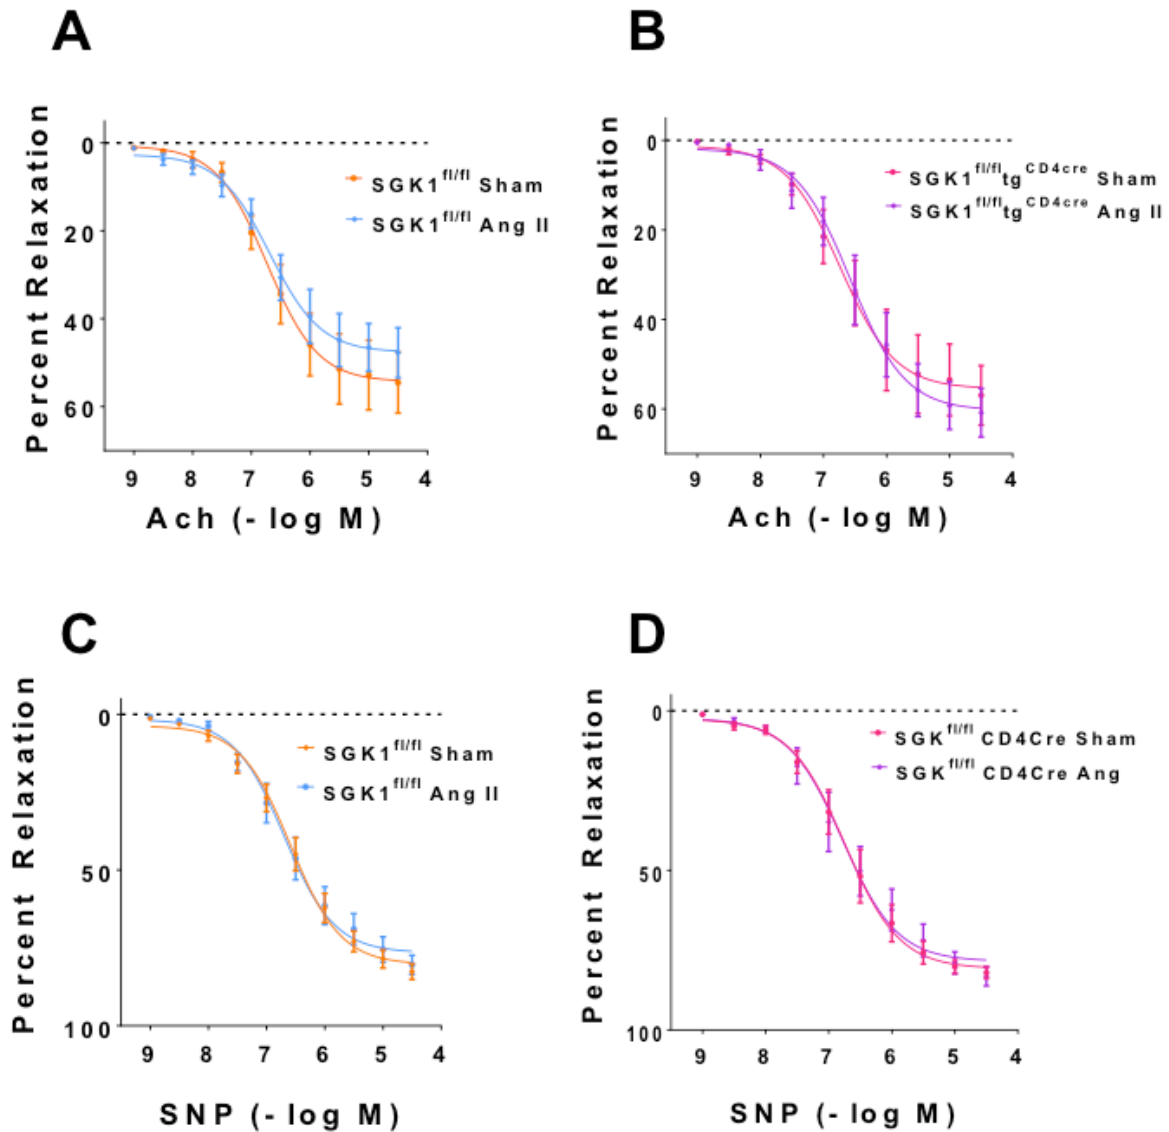

**Supplemental Figure 4. Vascular function is not impaired after 1 week of Ang II infusion.** SGK1<sup>fl/fl</sup> controls and SGK1<sup>fl/fl</sup>tg<sup>CD4cre</sup> mice were infused with Ang II or vehicle (Sham) for 7 days. Endothelium-dependent relaxation to increasing doses of acetylcholine (Ach) was measured in (A) SGK1<sup>fl/fl</sup> mice and (B) SGK1<sup>fl/fl</sup>tg<sup>CD4cre</sup> mice, and endothelium-independent relaxation to increasing doses of sodium nitroprusside (SNP) was measured in (C) SGK1<sup>fl/fl</sup> mice and (D) SGK1<sup>fl/fl</sup>tg<sup>CD4cre</sup> mice. Data were analyzed by linear regression; n=5-7 per group. All data are expressed as mean ± SEM.

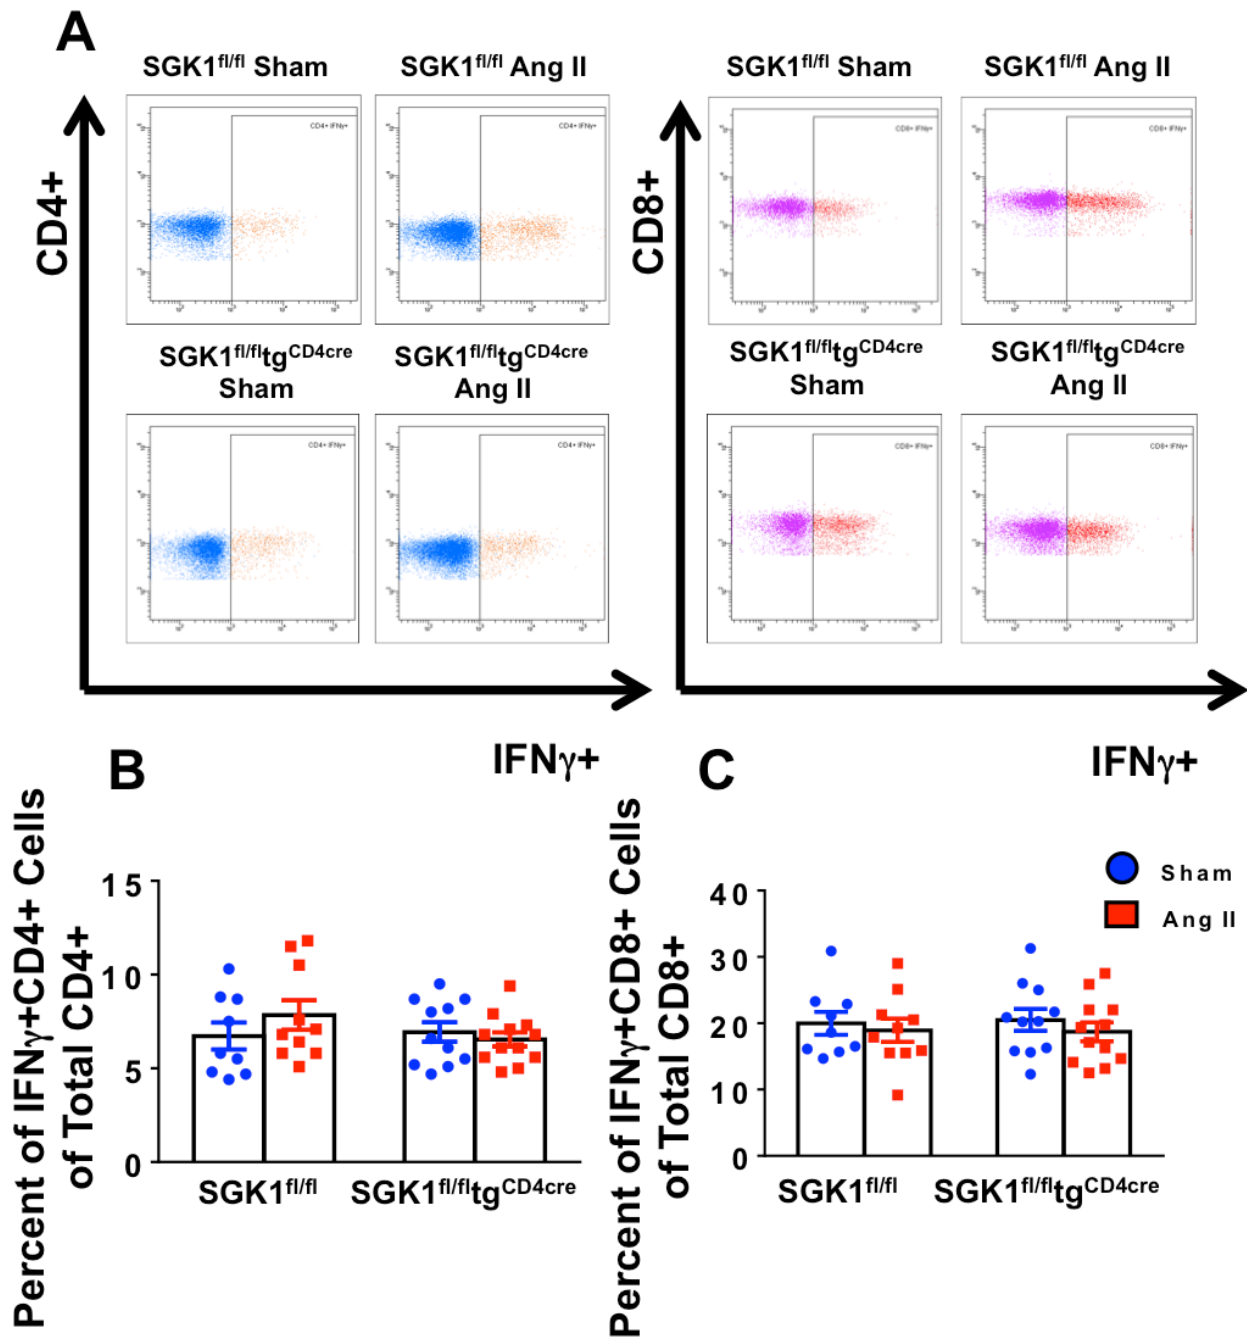

**Supplemental Figure 5. Frequency of splenic Th1/Tc1 cells is not altered by Ang II infusion or loss of T cell SGK1.** (A) Representative flow cytometry dot plots for CD4<sup>+</sup>IFN $\gamma$ <sup>+</sup> Th1 cells and CD8<sup>+</sup>IFN $\gamma$ <sup>+</sup> Tc1 cells in splenic single cell suspensions from SGK1<sup>fl/fl</sup> and SGK1<sup>fl/fl</sup>tg<sup>CD4cre</sup> mice infused with Ang II or vehicle (Sham) for 28 days. (B-C) Summary data of percentages of CD4<sup>+</sup>IFN $\gamma$ <sup>+</sup> Th1 cells out of total CD4<sup>+</sup> cells and CD8<sup>+</sup>IFN $\gamma$ <sup>+</sup> Tc1 cells out of total CD8<sup>+</sup> cells in the indicated groups. All data are expressed as mean  $\pm$  SEM (n=9-12 per group).

## Spleen:

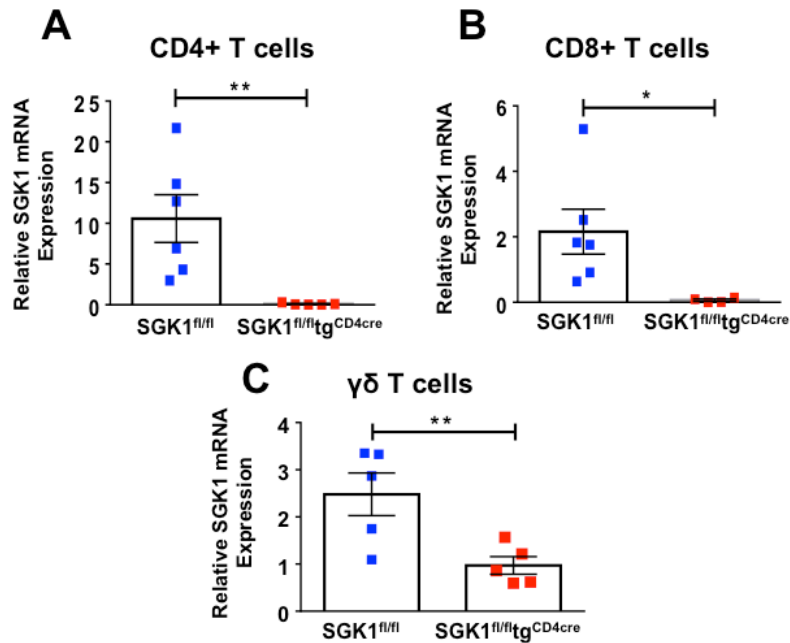

## Peripheral Blood:

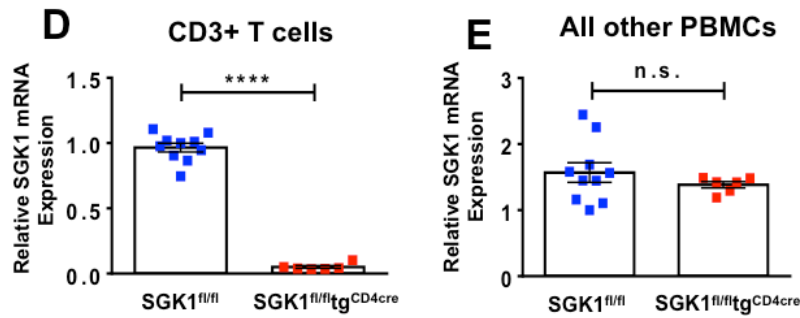

**Supplemental Figure 6. SGK1 expression in splenic T cell subsets and peripheral blood T and non-T cell fractions in SGK1<sup>fl/fl</sup> controls and SGK1<sup>fl/fl</sup>tg<sup>CD4cre</sup> mice.** Naïve CD4<sup>+</sup> T cells (A), naïve CD8<sup>+</sup> T cells (B), or  $\gamma\delta$  T cells (C) were isolated from spleens of SGK1<sup>fl/fl</sup> control and SGK1<sup>fl/fl</sup>tg<sup>CD4cre</sup> mice and cultured for 3 days on anti-CD3/anti-CD28 coated plates in the presence of Th17 polarizing cytokines plus an excess 40mM NaCl to maximize SGK1 expression which was then quantified by qRT-PCR. SGK1 expression was also quantified by qRT-PCR from peripheral blood CD3<sup>+</sup> T cells and all other PBMCs isolated from SGK1<sup>fl/fl</sup> control and SGK1<sup>fl/fl</sup>tg<sup>CD4cre</sup> mice. \* $P < 0.05$ , \*\* $P < 0.01$ , \*\*\*\* $P < 0.0001$ ; Student's t-test; n = 4-10 per group. All data are expressed as mean  $\pm$  SEM.

| <b>Sodium Channels and Transporters Expressed by T cells</b>    |
|-----------------------------------------------------------------|
| Epithelial Sodium Channel $\alpha,\beta,\gamma$ subunits (ENaC) |
| Sodium/Chloride Cotransporter (NCC)                             |
| Sodium/Calcium Exchanger 1 (NCX1)                               |
| Sodium/Calcium Exchanger 2 (NCX2)                               |
| Sodium/Hydrogen Exchanger 1 (NHE1)                              |
| Sodium/Hydrogen Exchanger 6 (NHE6)                              |
| Sodium/Potassium/2 Chloride Cotransporter 1 (NKCC1)             |
| Voltage-gated Sodium Channel 5A (SCN5A)                         |

**Supplemental Table 1. Sodium channels and transporters expressed by T cells.** Pan CD3<sup>+</sup> T cells were isolated from spleens of C57Bl/6J wild type mice. The indicated sodium channels/transporters were detected by RT-PCR.
